# Supplementary material
Source: PubMed Central journal article supplement (PMC6559362)
Supplement: NIHMS1018924-supplement-Supplemental.pdf [file NIHMS1018924-supplement-Supplemental.pdf]

## **SUPPLEMENTAL METHODS**

### **Additional protocols for generation of mouse model**

Pups were weaned from the mother 3-4 weeks after birth. Both male and female mice of 8-10 weeks old were used for wound closure studies. Mouse genomic DNA was extracted from tail biopsies using the REDExtract-N-Amp kit (Sigma Aldrich, St Louis, MO), which is a combination of both DNA extraction and PCR analysis. Briefly, tail biopsies were incubated with the tissue preparation solution and then extraction solution from the kit at 55°C for 10 minutes, followed by 95°C for 3 minutes. After adding neutralization solution, the samples were stored at 4°C. For PCR analysis, 10µl of the PCR reaction mix from the kit was mixed with 4µl of the tissue extract, 2µl each of the forward and reverse primers and 4µl water. The nucleotide sequences for the primers were C forward (within the exon 8) ttctctgaaggactactgtaccagaatgaa; and C reverse (downstream of the exon 11) gtgtgggggtgcgcaaagaaaagacacatt. The reactions were carried out as suggested by the kit manufacturer. All control and treatment groups were age and gender matched to reduce variabilities. The two anti-Hsp90 antibodies used in this study were Hsp90 $\alpha$  antibody from Novus Biologicals (NB120-2928, Littleton, CO) and Hsp90 $\beta$  antibody from StressMarq (H9010, Victoria, Canada). Please note that, while these antibodies do not cross react between human Hsp90 $\alpha$  and human Hsp90 $\beta$ , we found that they cross react at lower degrees between mouse Hsp90 $\alpha$  and mouse Hsp90 $\beta$  proteins. This was the reason why mass spec was utilized to confirm the identity of the mouse Hsp90 protein species in the Western blots (in Figure 3 and the text).

### **Western immunoblotting analysis of Hsp90 family proteins**

The experimental procedures as described in details by Zou et al. (Zou et al., 2017) were utilized in this study.

### **Colloidal gold (individual) cell motility assay**

The colloidal gold migration assay was conducted on isolated mouse fibroblasts as described previously (Cheng et al., 2008). The colloidal gold migration assay with a computer-assisted quantitation is currently the most sensitive and quantitative assay for testing pro-motility activity of a purified protein on individual cells, with the least influence of secreted molecules by surrounding neighbor cells. Data from multiple independent experiments ( $n \geq 3$ ) were collected and calculated. Results of a representative experiment was shown (mean  $\pm$  SD,  $p < 0.05$ ).

### **Additional protocols for animals**

All experiments using the pig model followed the procedures as described previously by us (O'Brien et al., 2014; Bhatia et al., 2016). Mice (both male and female mice of 8-10 weeks old) were anesthetized with a cocktail of ketamine and xylazine injected intraperitoneally, as well as isoflurane via inhalation (if necessary during preparation of the surgical procedures). Hair in the to-be-wounded area on the back of mice was shortened using an electrical shaver, followed by application of hair removal cream (Nair, Trenton, NJ). The exposed skin was cleaned with water and disinfected with betadine. Care was taken to ensure the bandage was not too tight to prevent breathing or too loose to come off during the experiment. The mice were kept under a heating lamp until they woke up and housed individually until end of the experiment.

### **Additional protocols for Histology and Immunohistochemistry(IHC)**

Fifteen randomly selected images under each condition were utilized to measure the relative distance of re-epithelialization under a specific condition or treatment, as previously reported by us (Cheng et al., 2011). In addition, the wound photographs will be presented to five "blinded" USC dermatology residents who have little knowledge of the experimental design and conditions. They will be asked to rate degree of the wound closure using a five-point scale, 0 = none; 1 = minimal or little difference (between treatment and placebo), 2 = moderate or visible difference, 3 = significant difference and 4 = dramatic change. IHC analyses included mouse monoclonal anti-Hsp90 $\alpha$  antibody (1:200, Calbiochem, Darmstadt, Germany) and mouse monoclonal anti-keratin (pan) antibody (Abcam, Cambridge, MA) staining. Excessive amount of recombinant Hsp90 $\alpha$  protein was used during IHC as the competitor for the antibody specificity control.

## Band #1

| Accession | Description                                                                                                   | Score  | Coverage |
|-----------|---------------------------------------------------------------------------------------------------------------|--------|----------|
| → P07901  | Heat shock protein HSP 90-alpha OS=Mus musculus GN=Hsp90aa1 PE=1 SV=4 - [HS90A_MOUSE]                         | 559.44 | 52.25    |
| Q71LX8    | Heat shock protein 84b OS=Mus musculus GN=Hsp90ab1 PE=2 SV=1 - [Q71LX8_MOUSE]                                 | 407.85 | 47.24    |
| O08601    | Microsomal triglyceride transfer protein large subunit OS=Mus musculus GN=Mtpp PE=2 SV=2 - [MTP_MOUSE]        | 244.65 | 41.95    |
| P08113    | Endoplasmin OS=Mus musculus GN=Hsp90b1 PE=1 SV=2 - [ENPL_MOUSE]                                               | 199.05 | 46.26    |
| P35564    | Calnexin OS=Mus musculus GN=Canx PE=1 SV=1 - [CALX_MOUSE]                                                     | 88.60  | 16.41    |
| A2A7A9    | Hexose-6-phosphate dehydrogenase (Glucose 1-dehydrogenase) OS=Mus musculus GN=H6pd PE=4 SV=1 - [A2A7A9_MOUSE] | 77.09  | 21.29    |
| Q9JLF6    | Protein-glutamine gamma-glutamyltransferase K OS=Mus musculus GN=Tgm1 PE=1 SV=2 - [TGM1_MOUSE]                | 54.38  | 12.15    |
| Q01853    | Transitional endoplasmic reticulum ATPase OS=Mus musculus GN=Vcp PE=1 SV=4 - [TERA_MOUSE]                     | 52.39  | 15.38    |
| Q8R0Y6    | Aldehyde dehydrogenase family 1 member L1 OS=Mus musculus GN=Aldh1l1 PE=2 SV=1 - [AL1L1_MOUSE]                | 42.43  | 15.41    |
| Q91ZX7    | Prolow-density lipoprotein receptor-related protein 1 OS=Mus musculus GN=Lrp1 PE=1 SV=1 - [LRP1_MOUSE]        | 30.56  | 1.96     |
| P57780    | Alpha-actinin-4 OS=Mus musculus GN=Actn4 PE=1 SV=1 - [ACTN4_MOUSE]                                            | 25.04  | 7.46     |
| Q8BHN3    | Neutral alpha-glucosidase AB OS=Mus musculus GN=Ganab PE=1 SV=1 - [GANAB_MOUSE]                               | 24.18  | 9.85     |
| Q9JKX3    | Transferrin receptor protein 2 OS=Mus musculus GN=Tfr2 PE=2 SV=2 - [TFR2_MOUSE]                               | 23.62  | 11.15    |
| E9Q1T0    | Uncharacterized protein OS=Mus musculus GN=Vmn2r67 PE=4 SV=1 - [E9Q1T0_MOUSE]                                 | 20.94  | 2.23     |
| Q3U6Y9    | Putative uncharacterized protein OS=Mus musculus GN=Cd36 PE=2 SV=1 - [Q3U6Y9_MOUSE]                           | 13.81  | 9.19     |
| Q3U026    | Putative uncharacterized protein OS=Mus musculus GN=Mogs PE=2 SV=1 - [Q3U026_MOUSE]                           | 13.71  | 6.95     |
| Q80VE7    | Ctnnb1 protein (Fragment) OS=Mus musculus GN=Ctnnb1 PE=2 SV=1 - [Q80VE7_MOUSE]                                | 13.17  | 5.60     |
| D3YTQ5    | Uncharacterized protein OS=Mus musculus GN=Acad11 PE=3 SV=1 - [D3YTQ5_MOUSE]                                  | 12.15  | 8.47     |
| Q02257    | Junction plakoglobin OS=Mus musculus GN=Jup PE=1 SV=3 - [PLAK_MOUSE]                                          | 12.09  | 4.03     |
| Q99JX8    | Psm2 protein (Fragment) OS=Mus musculus GN=Psm2 PE=2 SV=1 - [Q99JX8_MOUSE]                                    | 10.75  | 15.05    |
| Q3TA19    | Putative uncharacterized protein OS=Mus musculus GN=Slc4a1 PE=2 SV=1 - [Q3TA19_MOUSE]                         | 10.12  | 8.10     |

## Band #2

| Accession | Description                                                                                        | Score  | Coverage |
|-----------|----------------------------------------------------------------------------------------------------|--------|----------|
| → Q71LX8  | Heat shock protein 84b OS=Mus musculus GN=Hsp90ab1 PE=2 SV=1 - [Q71LX8_MOUSE]                      | 241.20 | 47.24    |
| Q3TKB9    | Putative uncharacterized protein (Fragment) OS=Mus musculus GN=Hsp90aa1 PE=2 SV=1 - [Q3TKB9_MOUSE] | 76.97  | 19.96    |
| Q8R0Y6    | Aldehyde dehydrogenase family 1 member L1 OS=Mus musculus GN=Aldh1l1 PE=2 SV=1 - [AL1L1_MOUSE]     | 40.07  | 14.08    |
| Q8BNF8    | Putative uncharacterized protein OS=Mus musculus GN=Vcp PE=2 SV=1 - [Q8BNF8_MOUSE]                 | 28.38  | 8.71     |
| Q3TGJ9    | Putative uncharacterized protein OS=Mus musculus GN=Gsn PE=2 SV=1 - [Q3TGJ9_MOUSE]                 | 21.17  | 11.49    |
| E9Q1T0    | Uncharacterized protein OS=Mus musculus GN=Vmn2r67 PE=4 SV=1 - [E9Q1T0_MOUSE]                      | 16.70  | 2.23     |
| Q3TA19    | Putative uncharacterized protein OS=Mus musculus GN=Slc4a1 PE=2 SV=1 - [Q3TA19_MOUSE]              | 14.71  | 8.10     |
| D3Z4Y4    | Uncharacterized protein OS=Mus musculus GN=Krt5 PE=3 SV=1 - [D3Z4Y4_MOUSE]                         | 12.21  | 7.64     |
| P35564    | Calnexin OS=Mus musculus GN=Canx PE=1 SV=1 - [CALX_MOUSE]                                          | 11.65  | 6.77     |
| Q80VE7    | Ctnnb1 protein (Fragment) OS=Mus musculus GN=Ctnnb1 PE=2 SV=1 - [Q80VE7_MOUSE]                     | 10.01  | 3.79     |

Continued on next page

### Band #3

| Accession | Description                                                                                                                           | Score  | Coverage |
|-----------|---------------------------------------------------------------------------------------------------------------------------------------|--------|----------|
| → Q3TKB9  | Putative uncharacterized protein (Fragment) OS=Mus musculus GN=Hsp90aa1 PE=2 SV=1 - [Q3TKB9_MOUSE]                                    | 223.15 | 46.40    |
| Q9WVK4    | EH domain-containing protein 1 OS=Mus musculus GN=Ehd1 PE=1 SV=1 - [EHD1_MOUSE]                                                       | 149.67 | 57.87    |
| Q71LX8    | Heat shock protein 84b OS=Mus musculus GN=Hsp90ab1 PE=2 SV=1 - [Q71LX8_MOUSE]                                                         | 105.68 | 28.04    |
| Q8BH64    | EH domain-containing protein 2 OS=Mus musculus GN=Ehd2 PE=1 SV=1 - [EHD2_MOUSE]                                                       | 98.42  | 48.43    |
| Q9D0I9    | Arginyl-tRNA synthetase, cytoplasmic OS=Mus musculus GN=Rars PE=2 SV=2 - [SYRC_MOUSE]                                                 | 94.31  | 42.42    |
| Q8QZY1    | Eukaryotic translation initiation factor 3 subunit L OS=Mus musculus GN=Eif3l PE=1 SV=1 - [EIF3L_MOUSE]                               | 87.67  | 38.48    |
| P11983    | T-complex protein 1 subunit alpha OS=Mus musculus GN=Tcp1 PE=1 SV=3 - [TCPA_MOUSE]                                                    | 82.93  | 47.12    |
| Q76MZ3    | Serine/threonine-protein phosphatase 2A 65 kDa regulatory subunit A alpha isoform OS=Mus musculus GN=Ppp2r1a PE=1 SV=3 - [2AAA_MOUSE] | 78.90  | 31.75    |
| P14685    | 26S proteasome non-ATPase regulatory subunit 3 OS=Mus musculus GN=Psm3 PE=2 SV=2 - [PSMD3_MOUSE]                                      | 77.40  | 35.66    |
| E9Q133    | Uncharacterized protein OS=Mus musculus GN=Cct3 PE=4 SV=1 - [E9Q133_MOUSE]                                                            | 76.76  | 48.13    |
| P80317    | T-complex protein 1 subunit zeta OS=Mus musculus GN=Cct6a PE=1 SV=3 - [TCPZ_MOUSE]                                                    | 69.65  | 40.11    |
| Q3UDS0    | Putative uncharacterized protein (Fragment) OS=Mus musculus GN=Hspa8 PE=2 SV=1 - [Q3UDS0_MOUSE]                                       | 63.35  | 42.13    |
| Q9QXY6    | EH domain-containing protein 3 OS=Mus musculus GN=Ehd3 PE=1 SV=2 - [EHD3_MOUSE]                                                       | 58.73  | 30.09    |
| Q3VZ24    | Putative uncharacterized protein OS=Mus musculus GN=Anxa6 PE=2 SV=1 - [Q3VZ24_MOUSE]                                                  | 46.94  | 25.36    |
| Q68FD5    | Clathrin heavy chain 1 OS=Mus musculus GN=Cltc PE=1 SV=3 - [CLH_MOUSE]                                                                | 46.49  | 10.81    |
| Q8BMK4    | Cytoskeleton-associated protein 4 OS=Mus musculus GN=Ckap4 PE=2 SV=2 - [CKAP4_MOUSE]                                                  | 44.46  | 29.74    |
| B7FAU9    | Filamin, alpha OS=Mus musculus GN=Flna PE=4 SV=1 - [B7FAU9_MOUSE]                                                                     | 43.87  | 7.73     |
| Q6NXX7    | Abce1 protein (Fragment) OS=Mus musculus GN=Abce1 PE=2 SV=1 - [Q6NXX7_MOUSE]                                                          | 41.13  | 24.00    |
| Q91VL7    | EH-domain containing 4 OS=Mus musculus GN=Ehd4 PE=2 SV=1 - [Q91VL7_MOUSE]                                                             | 34.67  | 18.85    |
| Q8VDD5    | Myosin-9 OS=Mus musculus GN=Myh9 PE=1 SV=4 - [MYH9_MOUSE]                                                                             | 32.31  | 6.73     |
| Q3TD51    | Putative uncharacterized protein OS=Mus musculus GN=Picalm PE=2 SV=1 - [Q3TD51_MOUSE]                                                 | 31.23  | 17.25    |
| Q99K51    | Plastin-3 OS=Mus musculus GN=Pls3 PE=1 SV=3 - [PLST_MOUSE]                                                                            | 29.26  | 18.25    |
| E9QNJ1    | Uncharacterized protein OS=Mus musculus GN=Ppp2r1b PE=4 SV=1 - [E9QNJ1_MOUSE]                                                         | 28.39  | 19.30    |
| P24527    | Leukotriene A-4 hydrolase OS=Mus musculus GN=Lta4h PE=1 SV=3 - [LKHA4_MOUSE]                                                          | 27.84  | 20.79    |
| A1E2B8    | Inducible heat shock protein 70 OS=Mus musculus GN=Hspa1a PE=3 SV=1 - [A1E2B8_MOUSE]                                                  | 26.72  | 14.51    |
| A3KGU5    | Spectrin alpha 2 OS=Mus musculus GN=Spna2 PE=4 SV=1 - [A3KGU5_MOUSE]                                                                  | 26.53  | 4.76     |
| P07724    | Serum albumin OS=Mus musculus GN=Alb PE=1 SV=3 - [ALBU_MOUSE]                                                                         | 24.84  | 2.14     |
| Q9CZK0    | Putative uncharacterized protein (Fragment) OS=Mus musculus GN=Srx9 PE=2 SV=2 - [Q9CZK0_MOUSE]                                        | 20.23  | 18.29    |
| Q5RKP4    | Rpn1 protein (Fragment) OS=Mus musculus GN=Rpn1 PE=2 SV=1 - [Q5RKP4_MOUSE]                                                            | 20.06  | 14.99    |
| Q61833    | Ribophorin OS=Mus musculus GN=Rpn2 PE=2 SV=1 - [Q61833_MOUSE]                                                                         | 19.35  | 14.66    |
| Q3TEF0    | Putative uncharacterized protein (Fragment) OS=Mus musculus GN=Cdc23 PE=2 SV=1 - [Q3TEF0_MOUSE]                                       | 17.78  | 12.06    |
| Q3TIR3    | Synembryon-A OS=Mus musculus GN=Ric8a PE=1 SV=2 - [RIC8A_MOUSE]                                                                       | 17.63  | 13.40    |
| Q5XJY5    | Coatomer subunit delta OS=Mus musculus GN=Arcn1 PE=2 SV=1 - [COPD_MOUSE]                                                              | 17.00  | 10.76    |
| Q3TE06    | Putative uncharacterized protein (Fragment) OS=Mus musculus GN=Wdr1 PE=2 SV=1 - [Q3TE06_MOUSE]                                        | 16.33  | 13.10    |
| P68373    | Tubulin alpha-1C chain OS=Mus musculus GN=Tuba1c PE=1 SV=1 - [TBA1C_MOUSE]                                                            | 16.09  | 16.04    |
| D3Z4Y4    | Uncharacterized protein OS=Mus musculus GN=Krt5 PE=3 SV=1 - [D3Z4Y4_MOUSE]                                                            | 15.63  | 9.77     |
| P04104    | Keratin, type II cytoskeletal 1 OS=Mus musculus GN=Krt1 PE=1 SV=4 - [K2C1_MOUSE]                                                      | 12.73  | 3.45     |
| Q8VEH5    | EPM2A-interacting protein 1 OS=Mus musculus GN=Epm2aip1 PE=2 SV=1 - [EPMIP_MOUSE]                                                     | 12.57  | 11.39    |
| Q6ZWS7    | Putative uncharacterized protein OS=Mus musculus GN=Camk2g PE=2 SV=1 - [Q6ZWS7_MOUSE]                                                 | 11.73  | 8.28     |
| D3Z028    | Uncharacterized protein OS=Mus musculus GN=Asns PE=4 SV=1 - [D3Z028_MOUSE]                                                            | 10.40  | 11.02    |

**Figure 2s.** Excised bands from Figure 2E (with \*) were subjected to protein extraction procedures (Cheng et al., 2008) to separate the proteins from polyacrylamide gel. TCA-extracted peptides were subjected mass spec analysis that revealed similarity profiles according to GenBank blast. Proteins with score greater than 10 are listed here. Arrows in red point the most likely genes related to each of the excised proteins.

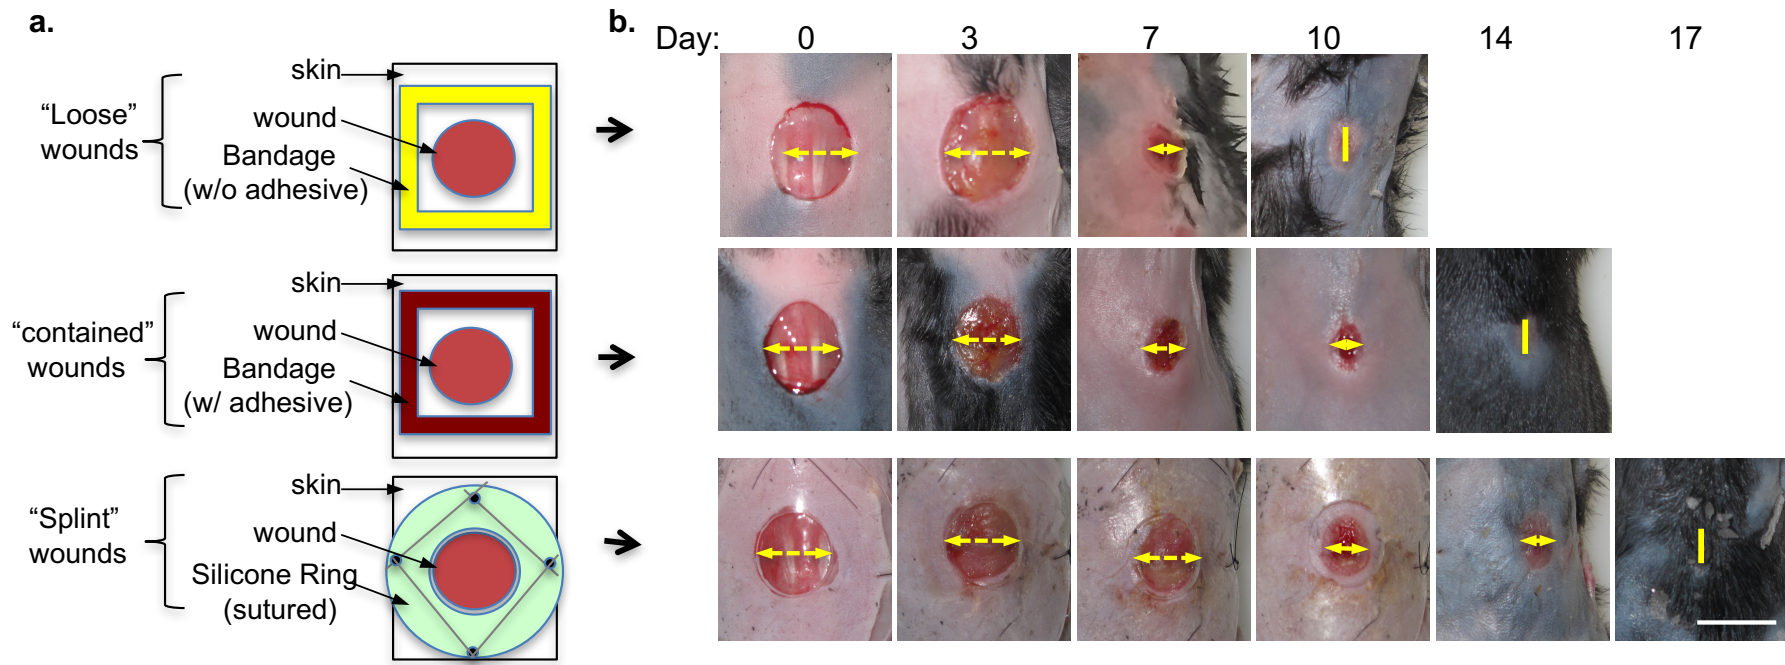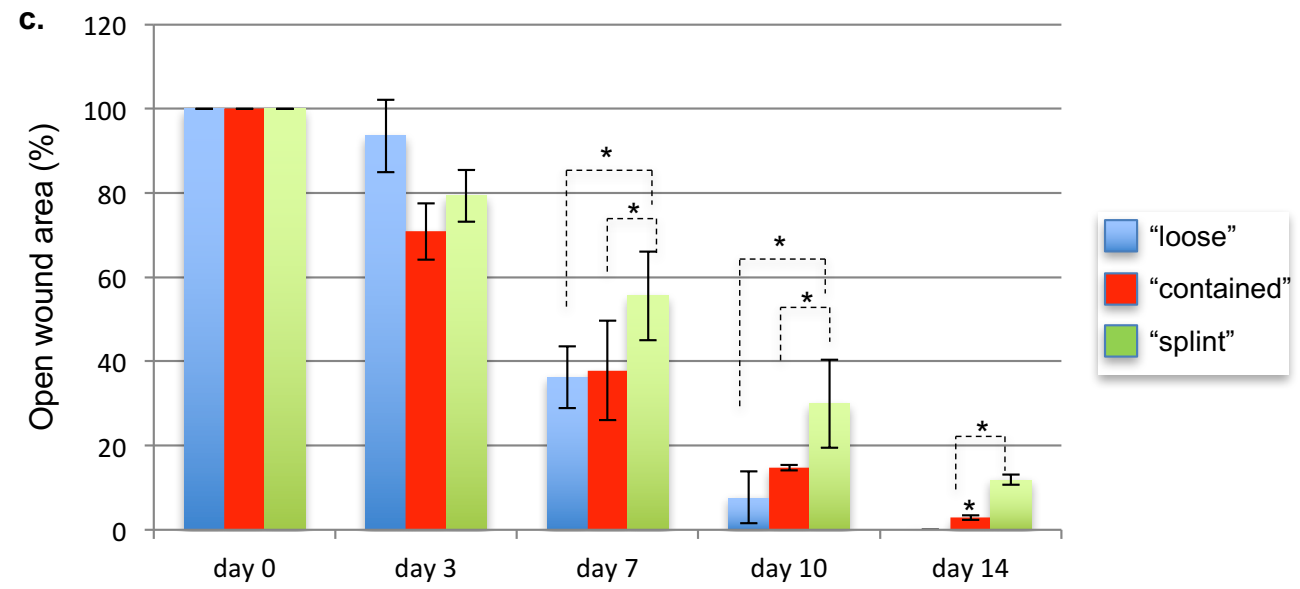

**Figure 2s**

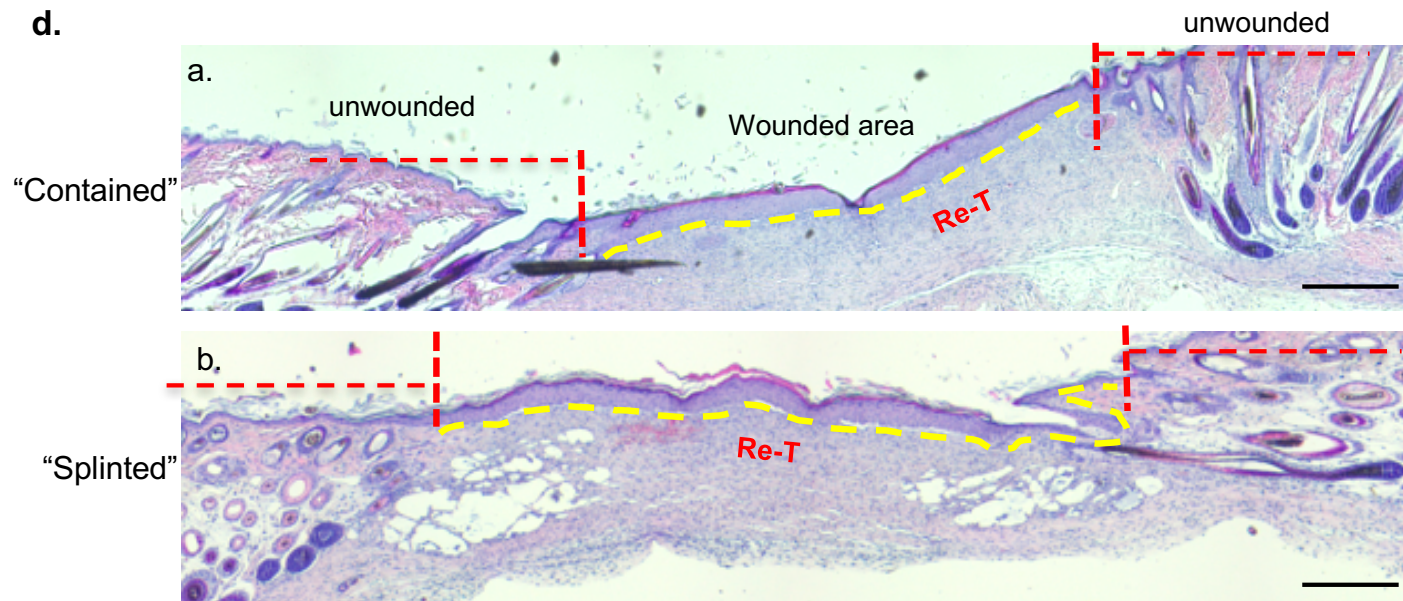

**Figure 2s. Comparison of wound healing rate among three types of commonly used mouse wound models.** (a) Schematic illustration of the three types of full-thickness excision wounds. (b) Images of 8 mm wound healing over time. (c) Quantitation of wound closure based on triplicates of a representative experiment. (d) Biopsies from 14-day “contained” wounds and 17-day “splinted” wounds were subjected H&E staining. Re-T, re-epithelialized tongue. These experiments were repeated three times.  $n = 3$ , \*  $p \leq 0.05$ . Scale bar for b, 1 cm, for d, 0.4 mm
